# Supplementary material for: Injectable, self-healing and degradable dynamic hydrogels with tunable mechanical properties and stability by thermal-induced micellization
Source: Royal Society of Chemistry journal article supplement (doi:10.1039/d4ra02480j), 2024-01-01
Supplement: d4ra02480j1.pdf [file d4ra02480j1.pdf]

## Electronic Supplementary Information (ESI)

# Injectable, Self-Healing and degradable Dynamic Hydrogels with Tunable Mechanical and Stability Properties by Thermal-induced Micellization

Chunqing, Lin,<sup>a</sup> Leniu Chen,<sup>a</sup> Yuan He,<sup>a</sup> Wenlong Xiang,<sup>a</sup> Yujin Nie,<sup>\*a</sup> Baixue Cai<sup>\*b</sup>, Zanru Guo<sup>\* a</sup>

<sup>a</sup>College of Chemistry, Chemical Engineering and Environmental Science, Minnan Normal University, Zhangzhou 363000, China.

<sup>b</sup>Chongqing Academy of Metrology and Quality Inspection, Chongqing 401120, PR China

### Synthesis route of ABA triblock copolymers P(NIPAM-*co*-DAAM)-*b*-PAM-*b*-P(DAAM-*co*-NIPAM)

RAFT polymerization was employed to prepare ABA triblock copolymers. As shown in Scheme S1, NIPAM and DAAM were firstly copolymerized to form difunctional macro-CTAs. And then AM was polymerized to form the triblock copolymers P(NIPAM-*co*-DAAM)-*b*-PAM-*b*-P(DAAM-*co*-NIPAM).

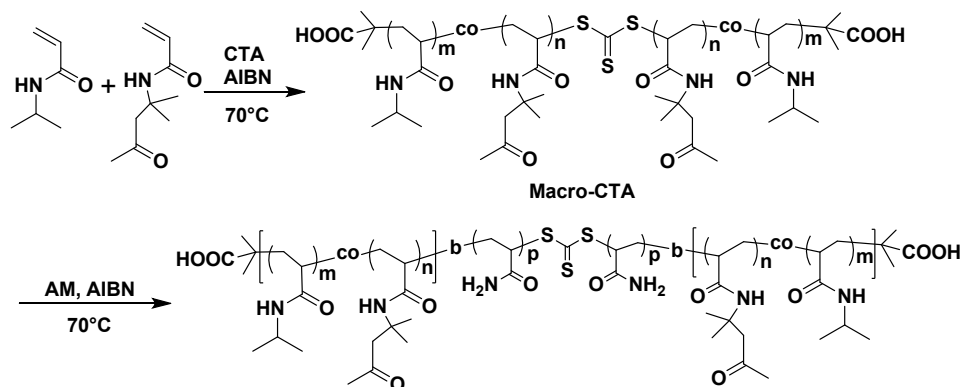

**Scheme S1.** Synthesis Route of the Macro-CTA and P(NIPAM-*co*-DAAM)-*b*-PAM-*b*-P(DAAM-*co*-NIPAM) ABA Triblock Copolymer.

<sup>1</sup>H NMR spectra of macro-CTAs

**Fig. S1** is the <sup>1</sup>H NMR spectra of macro-CTAs in CD<sub>3</sub>Cl. The signals at 0.7-1.7 ppm is the protons of CH<sub>2</sub> in main chains and (CH<sub>3</sub>)<sub>2</sub>C in DAAM side chain). The signals at 3.7-4.1 ppm is the protons of CH in NIPAM units. The signals at 3.4-3.6 ppm is the protons of CH<sub>2</sub> in DAAM units. The other protons assigned to the two units can be seen in the <sup>1</sup>H NMR spectra. Based on the integration the intensity ratio of NIPAM units and DAAM units, the molar ratio of DAAM and NIPAM units could be calculated by formula (S1):

$$C_{\text{DAAM}} : C_{\text{NIPAM}} = A_6 : 2A_3 \quad (\text{s1})$$

where  $C_{\text{DAAM}}$  and  $C_{\text{NIPAM}}$  were the molar ratios of DAAM and NIPAM;  $A_6$  and  $A_3$  were the integral ratio of the corresponding signals, respectively. The component parameters of the copolymers are listed in Table S1. One can find that the final composition of macro-CTAs was slightly different from the preset ratios due to the steric effect.

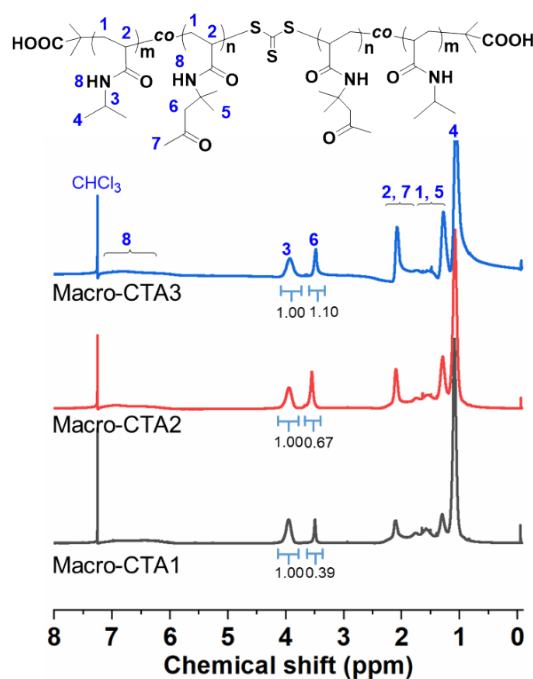

**Fig. S1** <sup>1</sup>H NMR spectra of macro-CTAs

## Electronic Supplementary Information (ESI)

Table S1. Physical parameters of macro-CTAs measured by  $^1\text{H}$  NMR and GPC

| Macro-CTAs | Feed ratio |      | Final composition <sup>a</sup> |      | Theoretical<br>$M_{n,theo}$<br>( $\text{g}\cdot\text{mol}^{-1}$ ) | $M_n$<br>( $\text{g}\cdot\text{mol}^{-1}$ ) <sup>b</sup> | $M_w/M_n$<br>(PDI) <sup>b</sup> |
|------------|------------|------|--------------------------------|------|-------------------------------------------------------------------|----------------------------------------------------------|---------------------------------|
|            | (mol %)    |      | (mol%)                         |      |                                                                   |                                                          |                                 |
|            | NIPAM      | DAAM | NIPAM                          | DAAM |                                                                   |                                                          |                                 |
| Macro-CTA1 | 90.0       | 10.0 | 83.9                           | 16.1 | 24,002                                                            | 23,010                                                   | 1.14                            |
| Macro-CTA2 | 80.0       | 20.0 | 74.9                           | 25.1 | 25,122                                                            | 24,972                                                   | 1.18                            |
| Macro-CTA3 | 70.0       | 30.0 | 64.5                           | 35.5 | 26,242                                                            | 25,020                                                   | 1.12                            |

<sup>a</sup> Expected number-average molecular weight from polymerization stoichiometry

<sup>b</sup> Determined by GPC

### The molecule weights (MWs) and polydispersity index of macro-CTAs and triblock copolymers

The  $M_{n,GPC}$  and polydispersity index (PDI) of the macro-CTAs were determined by GPC. As shown in Figure S2 and Table S1, the PDI was is lesser than 1.20, indicating that the molecule weights (MWs) of copolymers has a relative narrow distribution.  $M_{n,GPC}$  is close to the theoretical molecule weight ( $M_{n,theo}$ ), and thus  $M_{n,GPC}$  was used as the molecule weight of macro-CTAs.

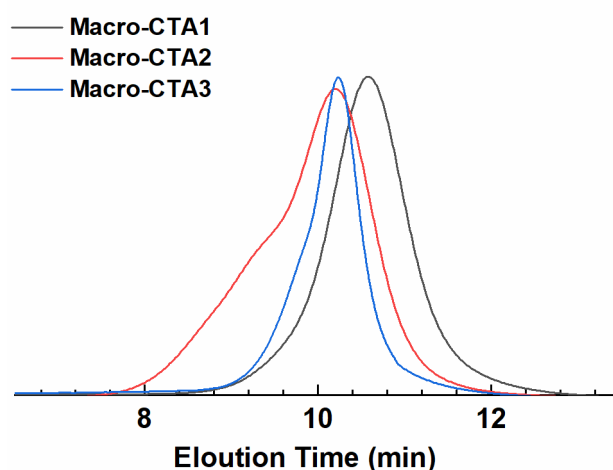

Fig. S2 GPC traces of precursor polymers

Fig. S3 is the GPC chromatogram for the copolymers. The GPC data was listed in Table 1.

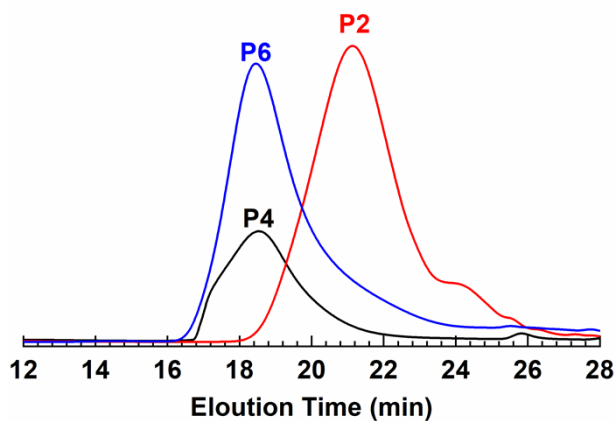

Fig. S3 GPC traces of ABA triblock copolymers

### SEM of hydrogels at 37 °C

The microstructure of hydrogels at 37 °C was observed by SEM. One can find that the network structure of hydrogels was similar to that of at 5 °C.

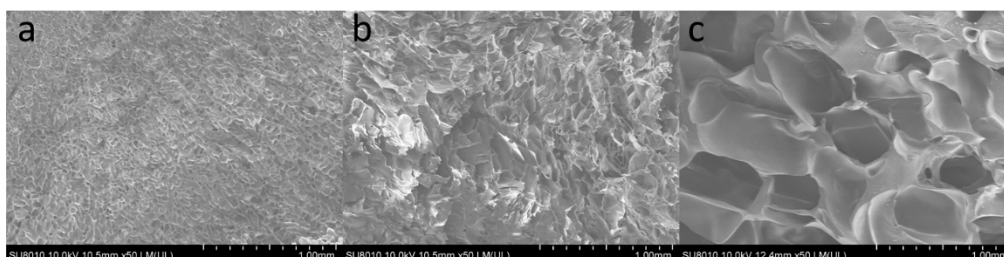

Fig. S4 SEM images of hydrogels H2 (a), H4 (b) and H6(c) at 37 °C.

### Degradation of hydrogel in solution ethanolamine

H4 samples were immersed into PBS and its buffer with ethanolamine (10 equiv. to trithiocarbonate groups) at pH 7.4, respectively (Fig. S5a). The hydrogel degraded in presence of ethanolamine after 2 h, while another one was just slight swelling in absence of ethanolamine (Fig. S5b).

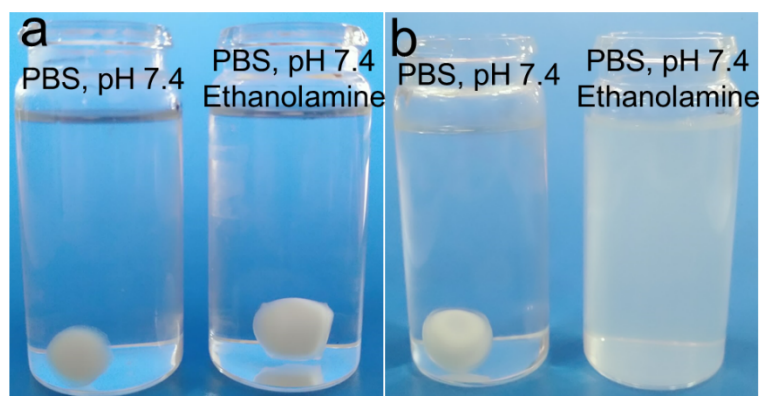

**Fig. S5** Degradation of gel in pH 7.4 (a) and pH 2.5 (b) phosphate buffered saline (PBS).

### The analysis of DOX release with different models

The data of DOX release from hydrogel H4 were analyzed using the zero-order, first-order, Higuchi, and Ritger-Peppas models by the Eqs. (s2)–(s5)<sup>[1]</sup>, respectively.

$$\text{Zero - order model : } M/M_z = kt \quad (\text{s2})$$

$$\text{First - order model : } M_t/M_z = 1 - e^{-kt} \quad (\text{s3})$$

$$\text{Higuchi model : } M_t/M_z = kt^{0.5} \quad (\text{s4})$$

$$\text{Ritger - Peppas model : } M_t/M_z = kt^n \quad (\text{s5})$$

where  $M_t/M_z$  represents the amount of DOX released at time  $t$ ;  $k$  is the kinetic constant; and  $n$  is the diffusional exponent that characterizes the mechanism of DOX release.  $n \leq 0.45$  corresponds to a Fickian diffusion,  $0.45 < n < 0.89$  to a non-Fickian or anomalous diffusion,  $n \geq 0.89$  to a zero-order transport<sup>[2,3]</sup>. The fitting results were listed in Table S2.

## Electronic Supplementary Information (ESI)

Table S2 Determined parameters of DOX released from H4 by fitting several kinetic equations.

| Models              | Conditions    | K                     | R <sup>2</sup> | n     |
|---------------------|---------------|-----------------------|----------------|-------|
| Zero-order model    | 5 °C, pH 2.0  | 41.26                 | 0.912          | -     |
|                     | 37 °C, pH 2.0 | 2.83                  | 0.832          | -     |
|                     | 37 °C, pH 7.4 | 3.39                  | 0.702          | -     |
| First-order model   | 5 °C, pH 2.0  | 393.47                | -2.835         | -     |
|                     | 37 °C, pH 2.0 | 8.61*10 <sup>-6</sup> | -4.261         | -     |
|                     | 37 °C, pH 7.4 | 8.27*10 <sup>-9</sup> | -4.433         | -     |
| Higuchi model       | 5 °C, pH 2.0  | 62.63                 | 0.947          | -     |
|                     | 37 °C, pH 2.0 | 12.11                 | 0.741          | -     |
|                     | 37 °C, pH 7.4 | 15.06                 | 0.383          | -     |
| Ritger-Peppas model | 5 °C, pH 2.0  | 66.02                 | 0.964          | 0.454 |
|                     | 37 °C, pH 2.0 | 19.95                 | 0.974          | 0.303 |
|                     | 37 °C, pH 7.4 | 26.10                 | 0.880          | 0.264 |

## References

- 1 Y. Liang, J. Song, H. Dong, Z. Huo, Y. Gao, Z. Zhou, Y. Tian, Y. Li and Y. Cao, *Sci. Total Environ.*, 2021, **787**, 147422.
- 2 A. Olejnik, I. Nowak and G. Schroeder, *Int. Environ. Sci. Te.*, 2019, **16**, 5623-5634.
- 3 S. Mongkolkitikul, N. Paradee and A. Sirivat, *Eur. J. Pharm. Sci.*, 2018, **112**, 20-27.
